# Supplementary material for: Evaluation of 2D and 3D Erythroid Differentiation Protocols Using Sickle Cell Disease and Healthy Donor Induced Pluripotent Stem Cells
Source: MDPI journal article supplement (doi:10.3390/cells12081121), 2023-04-10
Supplement: s1 [file s1]

Table S1: Brand and catalog number of relevant reagents (basal media, growth factors, cytokines, and antibodies)

| Reagent                                     | Brand                    | cat. number |
|---------------------------------------------|--------------------------|-------------|
| Ascorbic Acid                               | STEMCELL Technologies    | 72132       |
| bFGF                                        | PeproTech                | 100-18B     |
| BMP-4                                       | PeproTech                | 120-05      |
| CD34-PE                                     | BD Biosciences           | 555822      |
| CD43-BB515                                  | BD Biosciences           | 564542      |
| CD71-FITC                                   | BD Biosciences           | 340717      |
| CD235a-PE                                   | Beckman Coulter          | A07792      |
| Dexamethasone                               | STEMCELL Technologies    | 72092       |
| DRAQ5                                       | Thermo Fisher Scientific | 62251       |
| Flt3L                                       | PeproTech                | 300-19      |
| EPO                                         | PeproTech                | 100-64      |
| Heparin                                     | Sigma-Aldrich            | H3149       |
| Holo-transferrin                            | R&D Systems              | 2914-HT     |
| IGF-1                                       | PeproTech                | 100-11      |
| IL-3                                        | PeproTech                | 200-03      |
| IL-6                                        | PeproTech                | 200-06      |
| Insulin                                     | Sigma-Aldrich            | 91077C      |
| MethoCult™ H4034 Optimum                    | STEMCELL Technologies    | 04034       |
| Mouse IgG1, $\kappa$ -BB515 isotype control | BD Biosciences           | 564416      |
| Mouse IgG1, $\kappa$ -PE isotype control    | BD Biosciences           | 555749      |
| Mouse IgG2a-FITC isotype control            | BD Biosciences           | 340764      |
| SCF                                         | PeproTech                | 300-07      |
| STEMdiff™ APEL™2 Medium                     | STEMCELL Technologies    | 05270       |
| StemPro™-34 SFM                             | Thermo Fisher Scientific | 10639011    |
| TPO                                         | PeproTech                | 300-18      |

|                           |                          |        |
|---------------------------|--------------------------|--------|
| VEGF                      | PeproTech                | 100-20 |
| Y-27632 (Dihydrochloride) | STEMCELL Technologies    | 72304  |
| Taq DNA Polymerase Kit    | Thermo Fisher Scientific | 43680  |

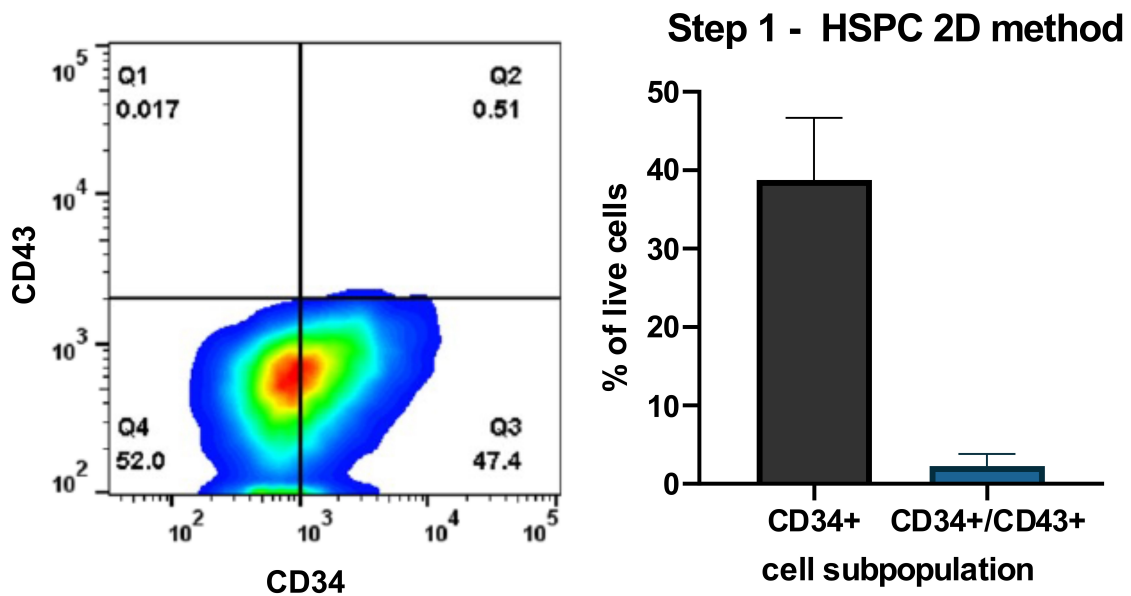

Figure S1: Flow cytometry analysis of Step 1 hematopoietic differentiation using 2D culture method.
